# Supplementary material
Source: PubMed Central journal article supplement (PMC3262923)
Supplement: NIHMS345924-supplement-1_si_001.pdf [file NIHMS345924-supplement-1_si_001.pdf]

## **Polyfluorinated Compounds in Serum Linked to Indoor Air in Office Environments**

Alicia J Fraser<sup>1</sup>, Thomas F Webster<sup>1</sup>, Deborah J Watkins<sup>1</sup>, Jessica W Nelson<sup>1</sup>, Heather M Stapleton<sup>2</sup>,  
Antonia M Calafat<sup>3</sup>, Kayoko Kato<sup>3</sup>, Mahiba Shoeib<sup>4</sup>, Verónica M Vieira<sup>1</sup>, Michael D McClean<sup>1\*</sup>

<sup>1</sup>Boston University School of Public Health, Boston, MA 02118

<sup>2</sup>Duke University, Nicholas School of the Environment, Durham NC 27708

<sup>3</sup>Centers for Disease Control and Prevention, Atlanta GA 30341

<sup>4</sup>Environment Canada, Toronto ON M3H 5T3

### **Supplemental Material**

#### **Table of Contents**

|                                                                                          |   |
|------------------------------------------------------------------------------------------|---|
| Air Sampling Procedures                                                                  | 2 |
| Analysis of Air Samples                                                                  | 3 |
| Analysis of Serum Samples                                                                | 4 |
| Supp Table 1: Polyfluorinated compound names, structures, and CAS numbers                | 5 |
| Supp Table 2: Pearson correlations ( <i>r</i> ) among log-transformed PFCs in office air | 7 |
| Supp Table 3: Pearson correlations ( <i>r</i> ) among log-transformed PFCs in serum      | 8 |
| Supp Table 4: PFC concentrations in serum and office air for each subject by building    | 9 |

## Air Sampling Procedures

We sampled air using a glass tube fitted with a glass fiber filter (GFF) followed by a 30 mm layer of pre-cleaned polyurethane foam (PUF), a layer of XAD-2 resin (1.5 g) and a second 30 mm layer of PUF (ORBO-1500, outside diameter 22 mm, Supelco, USA). Sampling media were connected to a stationary air pump using ¼-inch Tygon tubing and mounted approximately 1.2 m off the ground on a tripod located in a corner of the office. Pumps ran continuously for a total of 96 hours at 4 L/min; air flow was monitored at both the beginning and end of the four-day sampling period. We collected 3 field blanks and 3 pairs of duplicates. Field blanks were handled and treated the same as air sampling media except that they were not attached to pumps and were, instead, wrapped in foil and bubble wrap immediately after being exposed to the air. At the end of the 96 hour sampling period, sampling media were wrapped in foil and bubble wrap and stored at -20°C until shipped for analysis.

## Analysis of Air Samples

Particulate and gaseous phase neutral PFCs were captured and extracted together to provide total air concentrations of the target analytes. Prior to extraction, air sampling media (PUF/XAD-2/PUF) were spiked with 100  $\mu\text{L}$  (200  $\text{pg}/\mu\text{L}$ ) of standard solution containing the following isotopically labeled compounds:  $^{13}\text{C}$  6:2-FTOH,  $^{13}\text{C}$  8:2-FTOH,  $^{13}\text{C}$  10:2-FTOH,  $\text{D}_3$ -MeFOSA,  $\text{D}_5$ -EtFOSA,  $\text{D}_7$ -MeFOSE. Sample media were Soxhlet extracted together with GFFs in pre-cleaned cellulose thimbles (22 mm x 80 mm), with a 1:1 mixture of petroleum ether:acetone for 18-24 hours. Extracts were reduced to  $\sim 8$  mL by rotary evaporation, then blown down to  $\sim 0.5$  mL under nitrogen and solvent exchanged to ethyl acetate for gas chromatography–mass spectrometry (GC/MS) analysis of neutral PFCs. For the purpose of calculating sample recoveries, 10  $\mu\text{L}$  of N,N-Me<sub>2</sub>FOSA (10  $\text{ng}/\mu\text{L}$ ) was added prior to instrumental analysis.

Air sample extracts were measured for neutral PFCs (FTOHs, FOSAs and FOSEs) by GC-positive chemical ionization mass spectrometry (GC-PCIMS) using a Hewlett-Packard 6890 GC-5973 mass selective detector (MSD) in selective ion monitoring (SIM) mode. Methane was used as the reagent gas for PCI. Analytes were separated on a 30 m DB-wax column with 0.25 mm inside diameter and 0.25  $\mu\text{m}$  film thickness. Additional analytical details are given elsewhere.<sup>1</sup> Quantification was based on peak areas of the mass-labeled compounds (spiked before extraction) and the corresponding native compound peak areas. For example,  $^{13}\text{C}$  6:2-FTOH was used to calibrate 6:2-FTOH. In this way, analyte concentrations were adjusted to losses during sample extraction and volume reduction, as well as to signal enhancement or suppression due to potential matrix effects.<sup>2</sup> Because deuterated EtFOSE was not available at the time of the study,  $\text{D}_7$ -MeFOSE was used to calibrate both MeFOSE and EtFOSE. The air samples were not extracted for ionic compounds during analysis, thus measurement of the less volatile, ionic PFCs such as PFOA and PFOS was not possible. Compound recoveries were as follows: 6:2-FTOH (83% +/- 27), 8:2-FTOH (84% +/- 25), 10:2-FTOH (107% +/- 20), EtFOSA (128% +/- 30), MeFOSA (128% +/- 32), and MeFOSE (189% +/- 35).

## References

- (1) Shoeib, M.; Harner, T.; Webster, G.; Lee, S.C. Indoor sources of poly- and perfluorinated compounds (PFCs) in Vancouver, Canada: Implications for human exposure. *Environ. Sci. Technol.* In press DOI: 10.1021/es103562v.
- (2) Jahnke, A.; Ahrens, L.; Ebinghaus, R.; Berger, U.; Barber, J. L.; Temme, C. An improved method for

the analysis of volatile polyfluorinated alkyl substances in environmental air samples. *Anal. Bioanal. Chem.* **2007**, 387, 965-975.

#### Analysis of Serum Samples

After clotting and centrifugation, serum was recovered from whole blood and stored in polypropylene vials at -80 °C before being shipped on dry ice to CDC for analysis. PFCs were measured using a modification of a published method based on a solid phase extraction (SPE) system linked directly on-line with HPLC isotope dilution tandem mass spectrometry.<sup>3</sup> Internal standards (<sup>13</sup>C<sub>2</sub>-PFOA, <sup>13</sup>C<sub>5</sub>-perfluorononanoic acid [PFNA], <sup>13</sup>C<sub>2</sub>-perfluorodecanoic acid [PFDA], <sup>18</sup>O<sub>2</sub>-perfluorohexane sulfonic acid [PFHxS], <sup>18</sup>O<sub>2</sub>-PFOS, <sup>18</sup>O<sub>2</sub>-perfluorooctane sulfonamide [PFOSA], D<sub>3</sub>- N-methyl perfluorooctane sulfonamidoacetate [N-MeFOSAA], and D<sub>5</sub>-N-EtFOSAA) were added to 0.1 mL serum along with 0.1M formic acid. Spiked sera were placed on a Symbiosis on-line SPE system (Spark Holland, Plainsboro, NJ). The system loaded samples onto Polaris C18 SPE cartridges (Varian, Palo Alto, CA). PFCs were eluted off the cartridge directly into the Agilent 1100 HPLC (Agilent Technologies) with separation on a C8 column (Betasil C8, 50 mm x 3 mm, 5 μm; ThermoHypersil-Keystone, Bellefonte, PA) using a methanol-ammonium acetate in water gradient. An API 4000 (Applied Biosystems, Foster City, CA) mass spectrometer was equipped with a negative ion Turbo ion-spray source and one to three transitions per compound were monitored. All compounds were quantified using a relative response ratio to their isotopically-labeled internal standard. The calibration curve was created from standards purchased from Wellington Laboratories (except for N-MeFOSAA, N-EtFOSAA, and PFOS which were provided by 3M), spiked into bovine calf serum, and extracted alongside the samples.

#### **References**

- (1) Kuklennyik, Z.; Needham, L. L.; Calafat, A. M. Measurement of 18 perfluorinated organic acids and amides in human serum using on-line solid-phase extraction. *Anal. Chem.* **2005**, 77, 6085-6091.

Supplemental Material, Table 1. Polyfluorinated compound names, structures, and CAS numbers.

| Acronym   | Chemical Name                               | Structure                                                                            | CAS#      |
|-----------|---------------------------------------------|--------------------------------------------------------------------------------------|-----------|
| PFHxA     | Perfluorohexanoic acid                      | 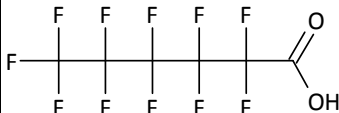    | 307-24-4  |
| PFHpA     | Perfluoroheptanoic acid                     |     | 375-85-9  |
| PFOA      | Perfluorooctanoic acid                      |    | 335-67-1  |
| PFNA      | Perfluorononanoic acid                      |    | 375-95-1  |
| PFDeA     | Perfluorodecanoic acid                      |   | 335-76-2  |
| PFUA      | Perfluoro-undecanoic acid                   |  | 2058-94-8 |
| PFDoA     | Perfluoro-dodecanoic acid                   |  | 307-55-1  |
| PFOS      | Perfluorooctane-sulfonic acid               |  | 1763-23-1 |
| PFHxS     | Perfluorohexane-sulfonic acid               |   | 355-46-4  |
| N-MeFOSAA | N-methyl perfluorooctane sulfonamidoacetate |  | No CAS#   |
| N-EtFOSAA | N-ethyl perfluorooctane sulfonamidoacetate  |  | No CAS#   |
| PFOSA     | Perfluorooctane-sulfonamide                 |  | 754-91-6  |

|           |                                             |                                                                                     |            |
|-----------|---------------------------------------------|-------------------------------------------------------------------------------------|------------|
| 6:2 FTOH  | 6:2 fluorotelomer alcohol                   | 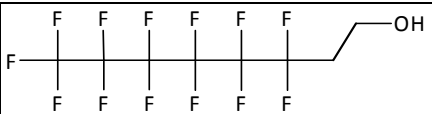  | 647-42-7   |
| 8:2 FTOH  | 8:2 fluorotelomer alcohol                   |   | 678-39-7   |
| 10:2 FTOH | 10:2 fluorotelomer alcohol                  |   | 865-86-1   |
| MeFOSA    | N-methyl perfluorooctane sulfonamide        |   | 31506-32-8 |
| EtFOSA    | N-ethyl perfluorooctane sulfonamide         |   | 4151-50-2  |
| MeFOSE    | N-methyl perfluorooctane sulfonamidoethanol |   | 24448-09-7 |
| EtFOSE    | N-ethyl perfluorooctane sulfonamidoethanol  |  | 1691-99-2  |

Supplemental Material, Table 2. Pearson correlations (*r*) among log-transformed PFCs in office air.

|           | 6:2<br>FTOH | 8:2<br>FTOH | 10:2<br>FTOH | Et<br>FOSA | Me<br>FOSA | Et<br>FOSE | Me<br>FOSE |
|-----------|-------------|-------------|--------------|------------|------------|------------|------------|
| 6:2 FTOH  | 1           | 0.49*       | 0.55*        | 0.04       | 0.21       | 0.14       | 0.31       |
| 8:2 FTOH  |             | 1           | 0.98*        | -0.36*     | -0.06      | 0.01       | 0.22       |
| 10:2 FTOH |             |             | 1            | -0.27      | -0.01      | 0.06       | 0.26       |
| EtFOSA    |             |             |              | 1          | 0.61*      | 0.56*      | 0.40*      |
| MeFOSA    |             |             |              |            | 1          | 0.55*      | 0.91*      |
| EtFOSE    |             |             |              |            |            | 1          | 0.55*      |
| MeFOSE    |             |             |              |            |            |            | 1          |

\*signifies  $p < 0.05$

Supplemental Material, Table 3. Pearson correlations (*r*) among log-transformed PFCs in serum.

|       | PFOA | PFNA  | PFDeA | PFHxS | PFOS  |
|-------|------|-------|-------|-------|-------|
| PFOA  | 1    | 0.50* | 0.25  | 0.55* | 0.53* |
| PFNA  |      | 1     | 0.78* | 0.46* | 0.76* |
| PFDeA |      |       | 1     | 0.26  | 0.73* |
| PFHxS |      |       |       | 1     | 0.57* |
| PFOS  |      |       |       |       | 1     |

\*signifies  $p < 0.05$





Supplemental Material, Table 4. PFC concentrations in serum and office air for each subject by building.

| LOD                      | PFC concentrations in serum (ng/mL) <sup>a</sup> |             |              |             |              |              |             |                  |                  | PFC concentrations in office air (pg/m <sup>3</sup> ) |                  |                   |                |                |                |                |
|--------------------------|--------------------------------------------------|-------------|--------------|-------------|--------------|--------------|-------------|------------------|------------------|-------------------------------------------------------|------------------|-------------------|----------------|----------------|----------------|----------------|
|                          | PFOA<br>0.1                                      | PFNA<br>0.1 | PFDeA<br>0.2 | PFUA<br>0.2 | PFDoA<br>0.2 | PFHxS<br>0.1 | PFOS<br>0.2 | N-MeFOSAA<br>0.2 | N-EtFOSAA<br>0.2 | 6:2-FTOH<br>19.5                                      | 8:2-FTOH<br>84.7 | 10:2-FTOH<br>24.5 | EtFOSA<br>1.26 | MeFOSA<br>0.40 | EtFOSE<br>0.03 | MeFOSE<br>12.6 |
| <b>Building A</b>        |                                                  |             |              |             |              |              |             |                  |                  |                                                       |                  |                   |                |                |                |                |
| 1                        | 5.2                                              | 1.7         | 0.4          | <LOD        | <LOD         | 1.3          | 14.6        | 0.5              | 0.4              | 1790                                                  | 38200            | 7810              | 17.2           | 9.7            | 98.6           | 160            |
| 2                        | 4.3                                              | 2.6         | 0.3          | 0.4         | <LOD         | 2.8          | 16.5        | 0.5              | <LOD             | 2940                                                  | 49200            | 9240              | 6.2            | 12.8           | <LOD           | 176            |
| 3                        | 4.1                                              | 1.6         | 0.5          | 0.3         | <LOD         | 0.8          | 6.9         | <LOD             | <LOD             | 1830                                                  | 41500            | 7910              | 6.7            | 25.7           | 20.4           | 301            |
| 4                        | 3.9                                              | 2.9         | 2.5          | 2.8         | 1.1          | 1.7          | 66.8        | <LOD             | <LOD             | <LOD                                                  | 26700            | 4560              | 9.1            | 15.4           | 8.9            | 179            |
| 5                        | 4.7                                              | 1.6         | 0.4          | 0.6         | <LOD         | 2.1          | 8.6         | <LOD             | <LOD             | 4080                                                  | 68300            | 12600             | 2.6            | 6.3            | 27.2           | 79.7           |
| 6                        | 5.8                                              | 2.1         | 0.3          | 0.3         | <LOD         | 3.3          | 22.4        | <LOD             | <LOD             | 2770                                                  | 70600            | 12100             | <LOD           | 5.9            | <LOD           | 86.0           |
| <b>Building B</b>        |                                                  |             |              |             |              |              |             |                  |                  |                                                       |                  |                   |                |                |                |                |
| 1                        | 4.4                                              | 1.8         | 0.3          | 0.2         | <LOD         | 1.3          | 16.4        | 0.3              | <LOD             | 10000                                                 | 30000            | 7950              | 36.9           | 60.8           | 63.1           | 739            |
| 2                        | 1.8                                              | 1.0         | 0.2          | 0.3         | <LOD         | 0.3          | 4.8         | 0.3              | <LOD             | 9010                                                  | 18800            | 6010              | 23.2           | 82.6           | 100            | 1170           |
| 3                        | 4.0                                              | 1.3         | 0.3          | <LOD        | <LOD         | 1.3          | 13.4        | 0.9              | <LOD             | 2730                                                  | 31500            | 7960              | 23.5           | 24.5           | 44.5           | 335            |
| 4 <sup>b</sup>           | 4.0                                              | 1.6         | 0.3          | 0.2         | <LOD         | 0.8          | 9.5         | <LOD             | <LOD             | 3520                                                  | 8870             | 3610              | 19.3           | 67.9           | 50.6           | 630            |
| 5                        | 8.9                                              | 1.1         | 0.2          | <LOD        | <LOD         | 2.2          | 9.8         | 0.9              | <LOD             | 1260                                                  | 23100            | 4590              | 13.7           | 11.3           | 22.4           | 151            |
| 6                        | 8.1                                              | 2.8         | 0.5          | <LOD        | <LOD         | 2.6          | 14.7        | 0.3              | <LOD             | 424                                                   | 13600            | 2960              | 10.3           | 29.8           | 38.0           | 237            |
| 7                        | 2.8                                              | 3.3         | 1.1          | 1.1         | 0.2          | 0.7          | 18.1        | <LOD             | <LOD             | 3640                                                  | 13000            | 5400              | 20.1           | 27.9           | 31.1           | 302            |
| 8                        | 2.2                                              | 1.4         | 0.3          | <LOD        | <LOD         | 0.5          | 6.3         | <LOD             | <LOD             | 1820                                                  | 11800            | 3430              | 26.3           | 120            | 151            | 1560           |
| 9 <sup>c</sup>           | 3.4                                              | 2.1         | 0.5          | NA          | <LOD         | 1.2          | 16.0        | 0.4              | <LOD             | NA                                                    | NA               | NA                | NA             | NA             | NA             | NA             |
| 10                       | 8.3                                              | 2.4         | 0.3          | 0.3         | <LOD         | 1.1          | 9.4         | 1.9              | 0.8              | 5130                                                  | 25700            | 6700              | 23.3           | 39.5           | 50.3           | 459            |
| 11 <sup>b</sup>          | 8.8                                              | 1.9         | 0.4          | 0.2         | <LOD         | 2.8          | 19.2        | 0.9              | <LOD             | 11000                                                 | 20800            | 5820              | 25.6           | 33.2           | 68.2           | 481            |
| 12                       | 3.6                                              | 1.3         | 0.3          | 0.2         | <LOD         | 1.1          | 5.5         | <LOD             | <LOD             | 9100                                                  | 44700            | 9490              | 40.7           | 162            | 216            | 2480           |
| 13                       | 3.8                                              | 1.6         | 0.3          | 0.4         | <LOD         | 2.6          | 9.0         | <LOD             | <LOD             | 429                                                   | 22300            | 4470              | 15.9           | 29.7           | 31.1           | 309            |
| 14                       | 3.9                                              | 2.6         | 0.7          | 0.7         | <LOD         | 2.4          | 9.7         | 0.4              | <LOD             | 1860                                                  | 8670             | 2580              | 42.7           | 41.9           | 84.0           | 419            |
| 15                       | 5.1                                              | 2.1         | 0.5          | 0.4         | <LOD         | 7.8          | 16.2        | <LOD             | <LOD             | 3890                                                  | 10300            | 3290              | 7.4            | 23.2           | 26.3           | 134            |
| 16                       | 4.1                                              | 1.2         | 0.2          | <LOD        | <LOD         | 1.8          | 10.5        | 0.4              | <LOD             | 1690                                                  | 16500            | 7650              | 51.2           | 109            | 82.8           | 1300           |
| 17                       | 4.6                                              | 1.6         | 0.4          | 0.2         | <LOD         | 3.1          | 8.8         | 0.2              | <LOD             | 1610                                                  | 11700            | 2460              | 13.3           | 32.0           | 22.8           | 298            |
| <b>Other<sup>d</sup></b> |                                                  |             |              |             |              |              |             |                  |                  |                                                       |                  |                   |                |                |                |                |
| 1                        | 1.7                                              | 1.7         | 0.4          | 0.6         | <LOD         | 0.7          | 9.2         | <LOD             | <LOD             | 286                                                   | 283              | 138               | 8.3            | 11.7           | 19.6           | 86.9           |
| 2                        | 4.7                                              | 1.3         | 0.3          | 0.2         | <LOD         | 0.8          | 10.9        | <LOD             | <LOD             | 431                                                   | 2210             | 966               | 21.1           | 15.0           | 11.7           | 82.3           |
| 3                        | 1.1                                              | 0.6         | <LOD         | <LOD        | <LOD         | 0.4          | 2.8         | <LOD             | <LOD             | <LOD                                                  | 1300             | 646               | 26.3           | 32.5           | 24.2           | 237            |
| 4                        | 1.5                                              | 0.7         | <LOD         | <LOD        | <LOD         | 0.2          | 3.4         | <LOD             | <LOD             | 417                                                   | 1010             | 355               | 13.5           | 16.8           | <LOD           | 48.5           |
| 5                        | 2.5                                              | 1.5         | 0.3          | <LOD        | <LOD         | 12.7         | 15.6        | 0.4              | <LOD             | 609                                                   | 1110             | 382               | 20.1           | 131            | 70.2           | 3880           |
| 6                        | 4.8                                              | 2.2         | 0.4          | 0.3         | <LOD         | 3.1          | 16.4        | 0.4              | <LOD             | 2520                                                  | 2090             | 1250              | 115            | 18.2           | 18.2           | 86.8           |
| 7                        | 2.9                                              | 1.2         | 0.3          | 0.3         | <LOD         | 2.2          | 7.6         | 0.3              | <LOD             | 563                                                   | 1410             | 410               | 47.3           | 59.0           | 26.2           | 364            |
| 8                        | 1.8                                              | 1.8         | 0.3          | 0.2         | <LOD         | 1.1          | 7.7         | <LOD             | <LOD             | 361                                                   | 430              | 212               | 34.7           | 16.9           | 17.6           | 57.8           |

<sup>a</sup>PFHxA, PFHpA, and PFOSA were undetected in all samples and are not listed (LOD = 0.6, 0.4, and 0.1, respectively).

<sup>b</sup>Air concentrations are the average of duplicate samples.

<sup>c</sup>Air concentrations not available due to malfunctioning air pump.

<sup>d</sup>Includes samples from 5 different buildings
